# Supplementary material for: Chemical synthesis and enzymatic properties of RNase A analogues designed to enhance second-step catalytic activity
Source: Royal Society of Chemistry journal article supplement (doi:10.1039/c6ob01163b), 2016-01-01
Supplement: c6ob01163b1.pdf [file c6ob01163b1.pdf]

# Supplementary Information

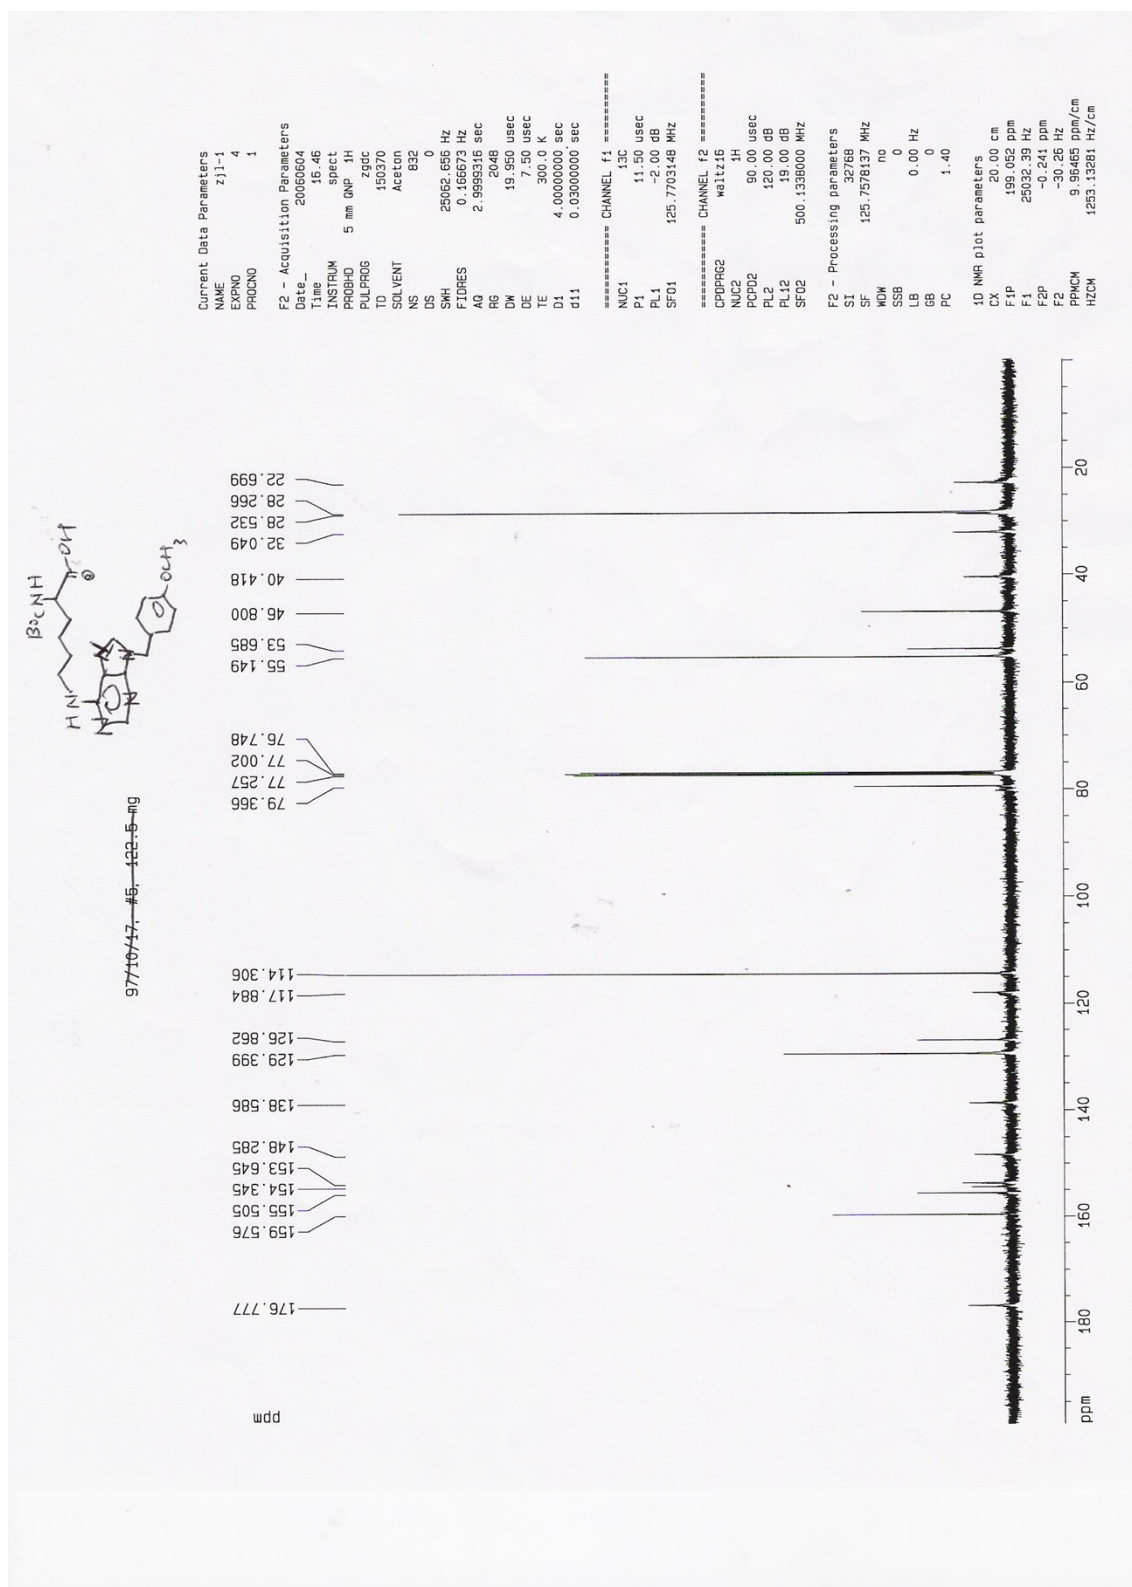

**Figure S1.** <sup>13</sup>C NMR spectrum of 9-(4'-Methoxybenzyl)-purine-(6-N<sup>ω</sup>)-N<sup>α</sup>-(*tert*-butoxycarbonyl)-L-lysine.

## Supplementary Information

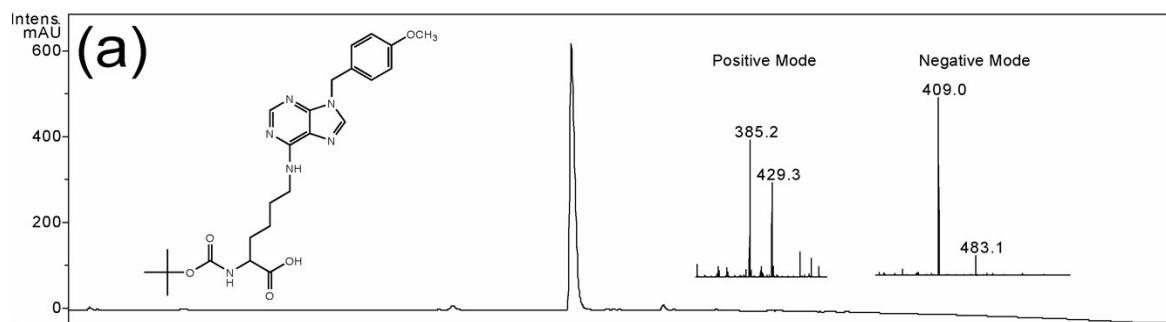

**Figure S2.**

LCMS data for 9-(4'-Methoxybenzyl)-purine-(6-N<sup>ω</sup>)-N<sup>α</sup>-(*tert*-butoxycarbonyl)-L-lysine.

Formula: C<sub>24</sub>H<sub>32</sub>N<sub>6</sub>O<sub>5</sub> Calculated mass (neutral; monoisotopic): 484.24 Da

# Supplementary Information

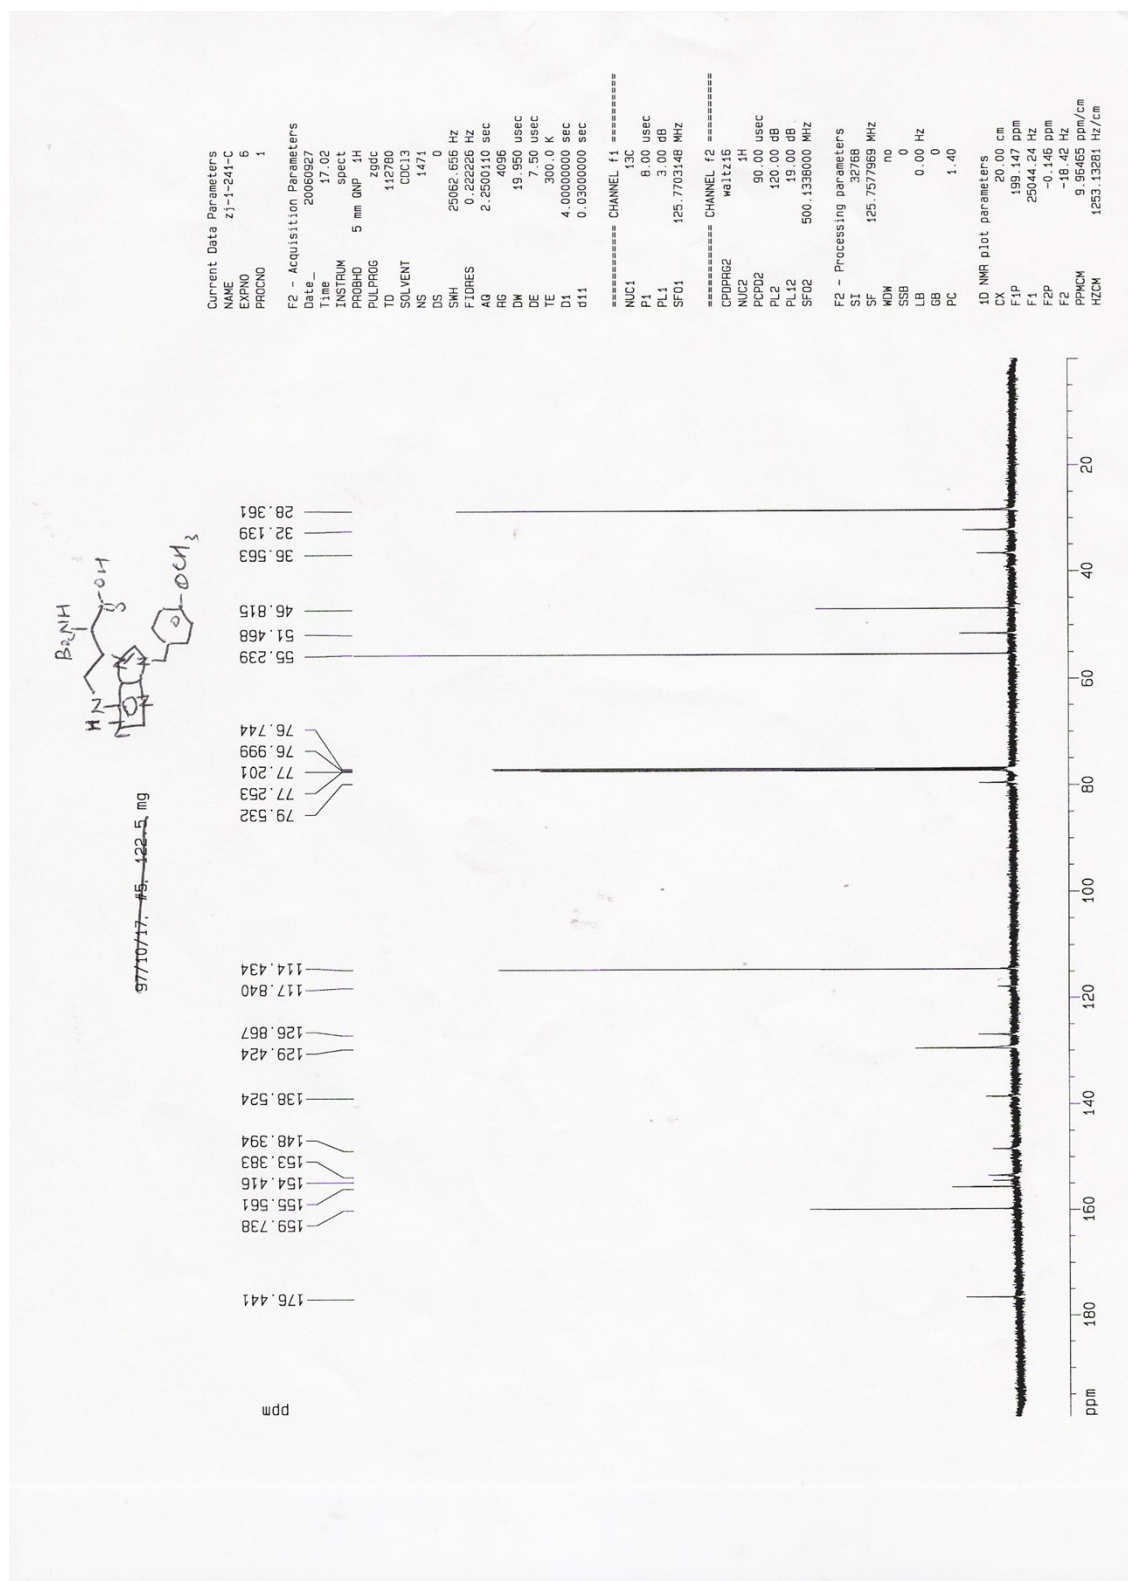

**Figure S3.**  $^{13}\text{C}$  NMR spectrum of 9-(4'-Methoxybenzyl)-purine-(6- $\text{N}^w$ )- $\text{N}^\alpha$ -(*tert*-butoxycarbonyl)-L-2,4-diaminobutyric acid.

## Supplementary Information

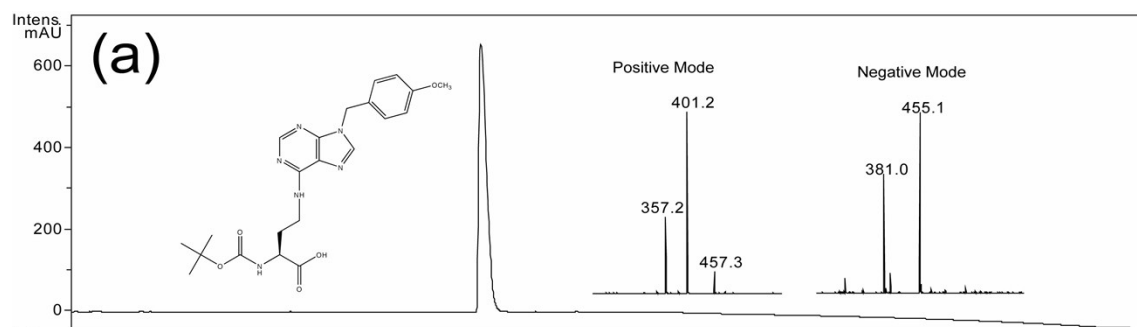

**Figure S4.**

LCMS data for 9-(4'-Methoxybenzyl)-purine-(6- $N^{\omega}$ )- $N^{\alpha}$ -(*tert*-butoxycarbonyl)-L-2,4-diaminobutyric acid.

Formula:  $C_{22}H_{28}N_6O_5$  Calculated mass (neutral; monoisotopic): 456.21 Da
